# Supplementary material for: Increased HLA-G Expression in Term Placenta of Women with a History of Recurrent Miscarriage Despite Their Genetic Predisposition to Decreased HLA-G Levels
Source: MDPI journal article supplement (doi:10.3390/ijms20030625), 2019-02-01
Supplement: s1 [file s1]

**Supplementary Table S1.** Hardy-Weinberg analyses for HLA-G 3'UTR genotypes in women with RM and controls.

| SNP   | <i>Recurrent miscarriage (n=23)</i> |                         |                          | <i>Controls (n=46)</i> |                         |                           |
|-------|-------------------------------------|-------------------------|--------------------------|------------------------|-------------------------|---------------------------|
|       | common<br><i>P</i>                  | homozygotes<br><i>P</i> | heterozygote<br><i>P</i> | common<br><i>P</i>     | homozygotes<br><i>P</i> | heterozygotes<br><i>P</i> |
| 14-bp | 0.1444                              | 0.3020                  | 0.3020                   | 0.1220                 | 0.3119                  | 0.2870                    |
| +3003 | #                                   | 0.9370                  | &                        | 0.5888                 | 0.7548                  | 0.6054                    |
| +3010 | 0.7171                              | 0.7637                  | 0.7526                   | 0.1379                 | 0.2975                  | 0.2953                    |
| +3027 | #                                   | 0.9653                  | &                        | 0.8602                 | 0.9474                  | 0.8626                    |
| +3035 | 0.6481                              | 0.7965                  | 0.6619                   | 0.7823                 | 0.9045                  | 0.7874                    |
| +3142 | 0.7171                              | 0.7637                  | 0.7526                   | 0.2322                 | 0.3997                  | 0.3987                    |
| +3187 | 0.5487                              | 0.6508                  | 0.5836                   | 0.3077                 | 0.3077                  | 0.2440                    |
| +3196 | 0.4238                              | 0.5347                  | 0.4688                   | 0.2315                 | 0.3908                  | 0.2679                    |
| +3422 | 0.9250                              | 0.9520                  | 0.9292                   | 0.5149                 | 0.7170                  | 0.5321                    |
| +3496 | #                                   | 0.8996                  | &                        | 0.5888                 | 0.7548                  | 0.6054                    |
| +3509 | 0.5855                              | 0.6588                  | 0.6280                   | 0.2938                 | 0.4428                  | 0.3332                    |

All Hardy-Weinberg analyses. *P*, p value. # Too many parameters for chi-square test. & Too few cases to calculate p-value.
