# Supplementary material for: Increased HLA-G Expression in Term Placenta of Women with a History of Recurrent Miscarriage Despite Their Genetic Predisposition to Decreased HLA-G Levels
Source: MDPI journal article supplement (doi:10.3390/ijms20030625), 2019-02-01
Supplement: s1 [file s1]

**Supplementary Table S2.** Hardy-Weinberg analyses for HLA-G 3'UTR genotypes in the RM and control offspring.

| SNP   | <i>Recurrent miscarriage (n=23)</i> |                         |                          | <i>Controls (n=46)</i> |                         |                           |
|-------|-------------------------------------|-------------------------|--------------------------|------------------------|-------------------------|---------------------------|
|       | common<br><i>P</i>                  | homozygotes<br><i>P</i> | heterozygote<br><i>P</i> | common<br><i>P</i>     | homozygotes<br><i>P</i> | heterozygotes<br><i>P</i> |
| 14-bp | 0.9577                              | 0.9647                  | 0.9637                   | 0.9011                 | 0.9341                  | 0.9314                    |
| +3003 | 0.9471                              | 0.9644                  | 0.9504                   | 0.8976                 | 0.9458                  | 0.9013                    |
| +3010 | 0.2058                              | 0.2920                  | 0.2883                   | 0.3181                 | 0.4854                  | 0.4820                    |
| +3027 | #                                   | 0.9653                  | &                        | #                      | 0.9877                  | &                         |
| +3035 | 0.7224                              | 0.8528                  | 0.7319                   | 0.7009                 | 0.8533                  | 0.7094                    |
| +3142 | 0.2921                              | 0.4575                  | 0.4567                   | 0.8841                 | 0.9179                  | 0.9179                    |
| +3187 | 0.8147                              | 0.8691                  | 0.8275                   | 0.7358                 | 0.7894                  | 0.7617                    |
| +3196 | 0.5487                              | 0.6508                  | 0.5836                   | 0.7862                 | 0.8389                  | 0.8038                    |
| +3422 | 0.4882                              | 0.6574                  | 0.5128                   | 0.9110                 | 0.9424                  | 0.9161                    |
| +3496 | 0.9471                              | 0.9644                  | 0.9504                   | 0.8976                 | 0.9458                  | 0.9013                    |
| +3509 | 0.5487                              | 0.6508                  | 0.5836                   | #                      | 0.8150                  | 0.7861                    |

All Hardy-Weinberg analyses. *P*, p value. # Too many parameters for chi-square test. & Too few cases to calculate p-value.
