# Supplementary material for: Increased HLA-G Expression in Term Placenta of Women with a History of Recurrent Miscarriage Despite Their Genetic Predisposition to Decreased HLA-G Levels
Source: MDPI journal article supplement (doi:10.3390/ijms20030625), 2019-02-01
Supplement: s1 [file s1]

**Supplementary Table S4.** HLA-G 3'UTR genotypic polymorphisms in women with recurrent miscarriage and uneventful pregnancy.

|                | <i>RM women<br/>(n=23)</i> |       | <i>Controls<br/>(n=44)</i> |       | <i>OR</i> | <i>95% CI</i> | <i>P</i> | <i>P<sub>c</sub></i> |
|----------------|----------------------------|-------|----------------------------|-------|-----------|---------------|----------|----------------------|
| <b>3003</b> CC | 0                          | 0.0%  | 2                          | 4.5%  | n.c.      |               |          |                      |
| CT             | 4                          | 17.4% | 10                         | 22.7% | 0.67      | 0.19-2.45     | 0.549    | 1.000                |
| TT             | 19                         | 82.6% | 32                         | 72.7% | ref.      |               |          |                      |
| <b>3010</b> CC | 8                          | 34.8% | 12                         | 27.3% | 0.94      | 0.30-3.01     | 0.923    | 1.000                |
| CG             | 12                         | 52.2% | 17                         | 38.6% | ref.      |               |          |                      |
| GG             | 3                          | 13.0% | 15                         | 34.1% | 0.28      | 0.07-1.20     | 0.087    | 1.000                |
| <b>3027</b> AA | 0                          | 0.0%  | 0                          | 0.0%  | n.c.      |               |          |                      |
| AC             | 3                          | 13.0% | 6                          | 13.6% | 0.95      | 0.22-4.21     | 0.946    | 1.000                |
| CC             | 20                         | 87.0% | 38                         | 86.4% | ref.      |               |          |                      |
| <b>3035</b> CC | 16                         | 69.6% | 36                         | 81.8% | ref.      |               |          |                      |
| CT             | 7                          | 30.4% | 8                          | 18.2% | 1.97      | 0.61-6.36     | 0.258    | 1.000                |
| TT             | 0                          | 0.0%  | 0                          | 0.0%  | n.c.      |               |          |                      |
| <b>3142</b> CC | 3                          | 13.0% | 14                         | 31.8% | 0.32      | 0.08-1.36     | 0.124    | 1.000                |
| CG             | 12                         | 52.2% | 18                         | 40.9% | ref.      |               |          |                      |
| GG             | 8                          | 34.8% | 12                         | 27.3% | 1.00      | 0.32-3.17     | 1.000    | 1.000                |
| <b>3187</b> AA | 11                         | 47.8% | 23                         | 52.3% | ref.      |               |          |                      |
| AG             | 11                         | 47.8% | 14                         | 31.8% | 1.64      | 0.57-4.48     | 0.362    | 1.000                |
| GG             | 1                          | 4.3%  | 7                          | 15.9% | 0.30      | 0.03-2.74     | 0.285    | 1.000                |
| <b>3196</b> CC | 10                         | 43.5% | 27                         | 61.4% | ref.      |               |          |                      |
| CG             | 12                         | 52.2% | 12                         | 27.3% | 2.70      | 0.92-7.95     | 0.071    | 1.000                |
| GG             | 1                          | 4.3%  | 5                          | 11.4% | n.c.      |               |          |                      |
| <b>3422</b> CC | 15                         | 65.2% | 33                         | 75.0% | ref.      |               |          |                      |
| CT             | 7                          | 30.4% | 9                          | 20.5% | 1.71      | 0.54-5.46     | 0.365    | 1.000                |
| TT             | 1                          | 4.3%  | 2                          | 4.5%  | n.c.      |               |          |                      |
| <b>3496</b> AA | 0                          | 0.0%  | 2                          | 4.5%  | n.c.      |               |          |                      |
| AG             | 5                          | 21.7% | 10                         | 22.7% | 0.89      | 0.26-3.01     | 0.850    | 1.000                |
| GG             | 18                         | 78.3% | 32                         | 72.7% | ref.      |               |          |                      |
| <b>3509</b> GG | 9                          | 39.1% | 26                         | 59.1% | ref.      |               |          |                      |
| GT             | 12                         | 52.2% | 13                         | 29.5% | 2.67      | 0.90-7.94     | 0.078    | 1.000                |
| TT             | 2                          | 8.7%  | 5                          | 11.4% | 1.16      | 0.19-7.04     | 0.875    | 1.000                |

Data are all n (%). All univariate logistic regression analysis. Per HLA-G genotype the highest prevalence was defined as the reference group. If percentages in a group were below 5%, no calculations were performed. *P*, *p* value; *P<sub>c</sub>*, *p* value corrected for multiple comparisons; *OR*, odds ratio; *95% CI*, 95% confidence interval; n.c., not calculated; ref, reference group.
