# Supplementary material for: Increased HLA-G Expression in Term Placenta of Women with a History of Recurrent Miscarriage Despite Their Genetic Predisposition to Decreased HLA-G Levels
Source: MDPI journal article supplement (doi:10.3390/ijms20030625), 2019-02-01
Supplement: s1 [file s1]

**Supplementary Table S3. Haplotypes of women in the RM group and the control group.**

|        | <i>RM women</i><br><i>2n=46</i> |       | <i>Controls</i><br><i>2n=88*</i> |       | <b>OR</b> | <b>95% C.I.</b> |              | <b>P</b> |
|--------|---------------------------------|-------|----------------------------------|-------|-----------|-----------------|--------------|----------|
|        |                                 |       |                                  |       |           | <b>Lower</b>    | <b>Upper</b> |          |
| UTR-1  | 13                              | 28.3% | 28                               | 31.8% | 0.90      | 0.413           | 1.965        | 0.792    |
| UTR-2  | 16                              | 34.8% | 23                               | 26.1% | 1.60      | 0.742           | 3.451        | 0.231    |
| UTR-3  | 5                               | 10.9% | 8                                | 9.1%  | 1.28      | 0.394           | 4.159        | 0.681    |
| UTR-4  | 5                               | 10.9% | 14                               | 15.9% | 0.68      | 0.229           | 2.019        | 0.487    |
| UTR-5  | 4                               | 8.7%  | 4                                | 4.5%  | 2.10      | 0.499           | 8.789        | 0.312    |
| UTR-7  | 3                               | 6.5%  | 7                                | 8.0%  | 0.85      | 0.209           | 3.440        | 0.817    |
| UTR-8  | 0                               | 0.0%  | 0                                | 0.0%  | x         | x               | x            | x        |
| UTR-18 | 0                               | 0.0%  | 3                                | 3.4%  | 0.00      | 0.000           |              | 0.999    |
| UTR-N  | 0                               | 0.0%  | 1                                | 1.1%  | 0.00      | 0.000           |              | 1.000    |
|        | 46                              | 100%  | 88                               | 100%  |           |                 |              |          |

All univariate logistic regression analysis. *P*, *p* value; *OR*, odds ratio; *95% CI*, 95% confidence interval; n.a, not applicable. \*In 2 control subjects the UTR haplotype could not be defined (4%).

The 3'UTR haplotype nomenclature is consistent with publication by Castelli et al.
