# Supplementary material for: Increased HLA-G Expression in Term Placenta of Women with a History of Recurrent Miscarriage Despite Their Genetic Predisposition to Decreased HLA-G Levels
Source: MDPI journal article supplement (doi:10.3390/ijms20030625), 2019-02-01
Supplement: s1 [file s1]

**Supplementary Table S5. Haplotypes of the offspring in the RM group and the control group.**

|        | <i>RM offspring</i><br><i>2n=46</i> |       | <i>Controls</i><br><i>2n=90*</i> |       | <b>OR</b> | <b>95% C.I.</b> |              | <b>P</b> |
|--------|-------------------------------------|-------|----------------------------------|-------|-----------|-----------------|--------------|----------|
|        |                                     |       |                                  |       |           | <b>Lower</b>    | <b>Upper</b> |          |
| UTR-1  | 11                                  | 23.9% | 28                               | 31.1% | 0.70      | 0.309           | 1.566        | 0.381    |
| UTR-2  | 13                                  | 28.3% | 26                               | 28.9% | 0.97      | 0.441           | 2.131        | 0.939    |
| UTR-3  | 6                                   | 13.0% | 11                               | 12.2% | 1.08      | 0.371           | 3.125        | 0.891    |
| UTR-4  | 10                                  | 21.7% | 12                               | 13.3% | 1.81      | 0.714           | 4.565        | 0.212    |
| UTR-5  | 3                                   | 6.5%  | 7                                | 7.8%  | 0.83      | 0.204           | 3.360        | 0.791    |
| UTR-7  | 3                                   | 6.5%  | 3                                | 3.3%  | 2.02      | 0.392           | 10.446       | 0.400    |
| UTR-8  | 0                                   | 0.0%  | 1                                | 1.1%  | 0.00      | 0.000           |              | 1.000    |
| UTR-18 | 0                                   | 0.0%  | 2                                | 2.2%  | 0.00      | 0.000           |              | 0.999    |
| UTR-N  | 0                                   | 0.0%  | 0                                | 0.0%  | x         | x               | x            | x        |
|        | 46                                  | 100%  | 90                               | 100%  |           |                 |              |          |

All univariate logistic regression analysis. *P*, *p* value; *OR*, odds ratio; *95% CI*, 95% confidence interval; n.a, not applicable. \*In 1 control subject the UTR haplotype could not be defined (2%).

The 3'UTR haplotype nomenclature is consistent with publication by Castelli et al.
