# Supplementary material for: Increased HLA-G Expression in Term Placenta of Women with a History of Recurrent Miscarriage Despite Their Genetic Predisposition to Decreased HLA-G Levels
Source: MDPI journal article supplement (doi:10.3390/ijms20030625), 2019-02-01
Supplement: s1 [file s1]

**Supplementary Table S6.** HLA-G 3'UTR genotypic polymorphisms in the offspring of women with recurrent miscarriage and uneventful pregnancy.

|                | <i>RM offspring<br/>(n=23)</i> |       | <i>Controls<br/>(n=45)</i> |       | <i>OR</i> | <i>95% CI</i> | <i>P</i> | <i>P<sub>c</sub></i> |
|----------------|--------------------------------|-------|----------------------------|-------|-----------|---------------|----------|----------------------|
| <b>3003</b> CC | 1                              | 4.3%  | 1                          | 2.2%  | n.c.      |               |          |                      |
|                | 8                              | 34.8% | 10                         | 22.2% | 1.94      | 0.63-5.95     | 0.245    | 1.000                |
|                | 14                             | 60.9% | 34                         | 75.6% | ref.      |               |          |                      |
| <b>3010</b> CC | 5                              | 21.7% | 11                         | 24.4% | 0.58      | 0.16-2.02     | 0.389    | 1.000                |
|                | 15                             | 65.2% | 19                         | 42.2% | ref.      |               |          |                      |
|                | 3                              | 13.0% | 15                         | 33.3% | 0.25      | 0.06-1.04     | 0.057    | 0.969                |
| <b>3027</b> AA | 0                              | 0.0%  | 0                          | 0.0%  | n.c.      |               |          |                      |
|                | 3                              | 13.0% | 3                          | 6.7%  | 2.10      | 0.39-11.34    | 0.389    | 1.000                |
|                | 20                             | 87.0% | 42                         | 93.3% | ref.      |               |          |                      |
| <b>3035</b> CC | 17                             | 73.9% | 35                         | 77.8% | ref.      |               |          |                      |
|                | 6                              | 26.1% | 10                         | 22.2% | 1.24      | 0.38-3.97     | 0.722    | 1.000                |
|                | 0                              | 0.0%  | 0                          | 0.0%  | n.c.      |               |          |                      |
| <b>3142</b> CC | 5                              | 21.7% | 11                         | 24.4% | 0.71      | 0.20-2.50     | 0.598    | 1.000                |
|                | 14                             | 60.9% | 22                         | 48.9% | ref.      |               |          |                      |
|                | 4                              | 17.4% | 12                         | 26.7% | 0.52      | 0.14-1.95     | 0.335    | 1.000                |
| <b>3187</b> AA | 13                             | 56.5% | 20                         | 44.4% | ref.      |               |          |                      |
|                | 9                              | 39.1% | 21                         | 46.7% | 0.66      | 0.23-1.88     | 0.436    | 1.000                |
|                | 1                              | 4.3%  | 4                          | 8.9%  | n.c.      |               |          |                      |
| <b>3196</b> CC | 11                             | 47.8% | 24                         | 53.3% | ref.      |               |          |                      |
|                | 11                             | 47.8% | 17                         | 37.8% | 1.41      | 0.50-4.00     | 0.516    | 1.000                |
|                | 1                              | 4.3%  | 4                          | 8.9%  | n.c.      |               |          |                      |
| <b>3422</b> CC | 14                             | 60.9% | 29                         | 64.4% | ref.      |               |          |                      |
|                | 9                              | 39.1% | 14                         | 31.1% | 1.33      | 0.47-3.82     | 0.594    | 1.000                |
|                | 0                              | 0.0%  | 2                          | 4.4%  | n.c.      |               |          |                      |
| <b>3496</b> AA | 1                              | 4.3%  | 1                          | 2.2%  | n.c.      |               |          |                      |
|                | 8                              | 34.8% | 10                         | 22.2% | 1.94      | 0.63-5.95     | 0.245    | 1.000                |
|                | 14                             | 60.9% | 34                         | 75.6% | ref.      |               |          |                      |
| <b>3509</b> GG | 11                             | 47.8% | 23                         | 51.1% | ref.      |               |          |                      |
|                | 11                             | 47.8% | 17                         | 37.8% | 1.35      | 0.48-3.85     | 0.571    | 1.000                |
|                | 1                              | 4.3%  | 4                          | 8.9%  | 0.52      | 0.05-5.25     | 0.581    | 1.000                |
|                | 0                              | 0.0%  | 1                          | 2.2%  | n.c.      |               |          |                      |

Data are all n (%). All univariate logistic regression analysis. Per HLA-G genotype the highest prevalence was defined as the reference group. If percentages in a group were below 5%, no calculations were performed. *P*, *p* value; *P<sub>c</sub>*, *p* value corrected for multiple comparisons; *OR*, odds ratio; *95% CI*, 95% confidence interval; n.c., not calculated; ref, reference group.
